# Supplementary material for: A hierarchical anatomical classification schema for prediction of phenotypic side effects
Source: PLoS One. 2018 Mar 1;13(3):e0193959. doi: 10.1371/journal.pone.0193959 (PMC5832387; doi:10.1371/journal.pone.0193959)
Supplement: S3 Table — (XLSX) [file pone.0193959.s004.xlsx]

## Sheet: Sheet1
		Test Set (20% of the data)			Leave-One-Out Cross Validation
		F2-Score	AUC	Balanced Measure	F2-Score	AUC	Balanced Measure
RandomForest Classifier	Side Effect Level	0.36	0.92	0.64	0.33	0.88	0.6
	Organ Level	0.74	0.92	0.83	0.77	0.95	0.86
	Sub-Systems	0.81	0.93	0.87	0.83	0.91	0.87
	Systems Level	0.89	0.92	0.91	0.89	0.9	0.89
VotingClassifier	Side Effect Level	0.29	0.87	0.58	0.22	0.86	0.54
	Organ Level	0.76	0.89	0.83	0.8	0.88	0.84
	Sub-Systems	0.81	0.87	0.84	0.76	0.88	0.8
	Systems Level	0.89	0.9	0.89	0.88	0.93	0.9
